# Supplementary material
Source: HighWire-hosted journal article supplement (https://jnm.snmjournals.org/highwire/filestream/94678/field_highwire_adjunct_files/0/145011_Supplemental_Data.pdf)
Supplement: 145011_Supplemental_Data.pdf [file 145011_Supplemental_Data.pdf]

Supplemental Table 1: FIGO staging of gynecologic malignancies

**Uterine Cervical Cancer**

|           |                                                                                                                                                                                                    |
|-----------|----------------------------------------------------------------------------------------------------------------------------------------------------------------------------------------------------|
| Stage I   | The carcinoma is strictly confined to the cervix (extension to corpus would be disregarded)                                                                                                        |
| IA        | Invasive carcinoma which can be diagnosed only by microscopy, with deepest invasion $\leq 5$ mm and largest extension $\geq 7$ mm                                                                  |
| IA1       | Measured stromal invasion of $\leq 3$ mm in depth and extension of $\leq 7$ mm                                                                                                                     |
| IA2       | Measured stromal invasion of $> 3$ mm and not $> 5$ mm with an extension not $> 7$ mm                                                                                                              |
| IB        | Clinically visible lesions limited to the cervix uteri or preclinical cancers greater than stage IA                                                                                                |
| IB1       | Clinically visible lesion $\leq 4$ cm in greatest dimension                                                                                                                                        |
| IB2       | Clinically visible lesion $> 4$ cm in greatest dimension                                                                                                                                           |
| Stage II  | Cervical carcinoma invades beyond the uterus, but not to the pelvic wall or the lower third of the vagina                                                                                          |
| IIA       | Without parametrial invasion                                                                                                                                                                       |
| IIA1      | Clinically visible lesion $\leq 4$ cm in greatest dimension                                                                                                                                        |
| IIA2      | Clinically visible lesion $> 4$ cm in greatest dimension                                                                                                                                           |
| IIB       | Without obvious parametrial invasion                                                                                                                                                               |
| Stage III | The tumor extends to the pelvic wall and/or involves the lower third of the vagina and/or causes hydronephrosis or nonfunctioning kidney                                                           |
| IIIA      | Tumor involves lower third of the vagina, with no extension to the pelvic wall                                                                                                                     |
| IIIB      | Extension to the pelvic wall and/or hydronephrosis or nonfunctioning kidney                                                                                                                        |
| Stage IV  | The carcinoma has extended beyond the true pelvis or has involved (biopsy-proven) the mucosa of the bladder or rectum. A bullous edema, as such, does not permit a case to be allotted to stage IV |
| IVA       | Spread of the growth to adjacent organs                                                                                                                                                            |
| IVB       | Spread to distant organs                                                                                                                                                                           |

**Uterine Endometrial Cancer**

|           |                                                                             |
|-----------|-----------------------------------------------------------------------------|
| Stage I   | Tumor confined to the corpus uteri                                          |
| IA        | No or less than half myometrial invasion                                    |
| IB        | Invasion equal to or more than half of the myometrium                       |
| Stage II  | Tumor invades the cervical stroma but does not extend beyond the uterus     |
| Stage III | Local and/or regional spread of the tumor                                   |
| IIIA      | Tumor invades the serosa of the corpus uteri and/or adnexae                 |
| IIIB      | Vaginal and/or parametrial involvement                                      |
| IIIC      | Metastases to pelvic and/or paraaortic lymph nodes                          |
| IIIC1     | Positive pelvic nodes                                                       |
| IIIC2     | Positive paraaortic lymph nodes with or without positive pelvic lymph nodes |
| Stage IV  | Tumor invades bladder and/or bowel mucosa, and/or distant metastases        |
| IVA       | Tumor invasion of bladder and/or bowel mucosa                               |

IVB Distant metastases, including intraabdominal metastases and/or inguinal lymph nodes

### **Ovarian, Fallopian Tube and Peritoneal Cancer**

|           |       |                                                                                                                                                                                                                                               |
|-----------|-------|-----------------------------------------------------------------------------------------------------------------------------------------------------------------------------------------------------------------------------------------------|
| Stage I   |       | Tumor confined to ovaries or fallopian tube(s)                                                                                                                                                                                                |
|           | IA    | Tumor limited to one ovary (capsule intact) or fallopian tube; no tumor on ovarian or fallopian tube surface; no malignant cells in the ascites or peritoneal washings.                                                                       |
|           | IB    | Tumor limited to both ovaries (capsules intact) and fallopian tubes; no tumor on ovarian or fallopian tube surface; no malignant cells in the ascites or peritoneal washings                                                                  |
|           | IC    | Tumor limited to one or both ovaries or fallopian tubes, with any of the following:                                                                                                                                                           |
|           | IC1   | Surgical spill intraoperatively                                                                                                                                                                                                               |
|           | IC2   | Capsule ruptured before surgery or tumor on ovarian or fallopian tube surface                                                                                                                                                                 |
|           | IC3   | Malignant cells present in the ascites or peritoneal washings                                                                                                                                                                                 |
| Stage II  |       | Tumor involves one or both ovaries or fallopian tubes with pelvic extension (below pelvic brim) or peritoneal cancer                                                                                                                          |
|           | IIA   | Extension and/or implants on the uterus and/or fallopian tubes/and/or ovaries                                                                                                                                                                 |
|           | IIB   | Extension to other pelvic intraperitoneal tissues                                                                                                                                                                                             |
| Stage III |       | Tumor involves one or both ovaries, or fallopian tubes, or primary peritoneal cancer, with cytologically or histologically confirmed spread to the peritoneum outside the pelvis and/or metastasis to the retroperitoneal lymph nodes         |
|           | IIIA  | Metastasis to the retroperitoneal lymph nodes with or without microscopic peritoneal involvement beyond the pelvis                                                                                                                            |
|           | IIIA1 | Positive retroperitoneal lymph nodes only (cytologically or histologically proven)                                                                                                                                                            |
|           | IIIA2 | Microscopic extrapelvic (above the pelvic brim) peritoneal involvement with or without positive retroperitoneal lymph nodes                                                                                                                   |
|           | IIIB  | Macroscopic peritoneal metastases beyond the pelvic brim $\leq 2$ cm in greatest dimension, with or without metastasis to the retroperitoneal lymph nodes                                                                                     |
|           | IIIC  | Macroscopic peritoneal metastases beyond the pelvic brim $> 2$ cm in greatest dimension, with or without metastases to the retroperitoneal nodes; tumor extension to liver or splenic capsule without parenchymal involvement of either organ |
| Stage IV  |       | Distant metastasis excluding peritoneal metastases                                                                                                                                                                                            |
|           | IVA   | Pleural effusion with positive cytology                                                                                                                                                                                                       |
|           | IVB   | Metastases to extraabdominal organs (including inguinal lymph nodes and lymph nodes outside abdominal cavity); extension of tumor to liver and spleen parenchyma                                                                              |
